# Supplementary material for: Global analysis of the insulator binding protein CTCF in chromatin barrier regions reveals demarcation of active and repressive domains
Source: HighWire-hosted journal article supplement (doi:10.1101/gr.082800.108), 2008-12-03

Figure S2

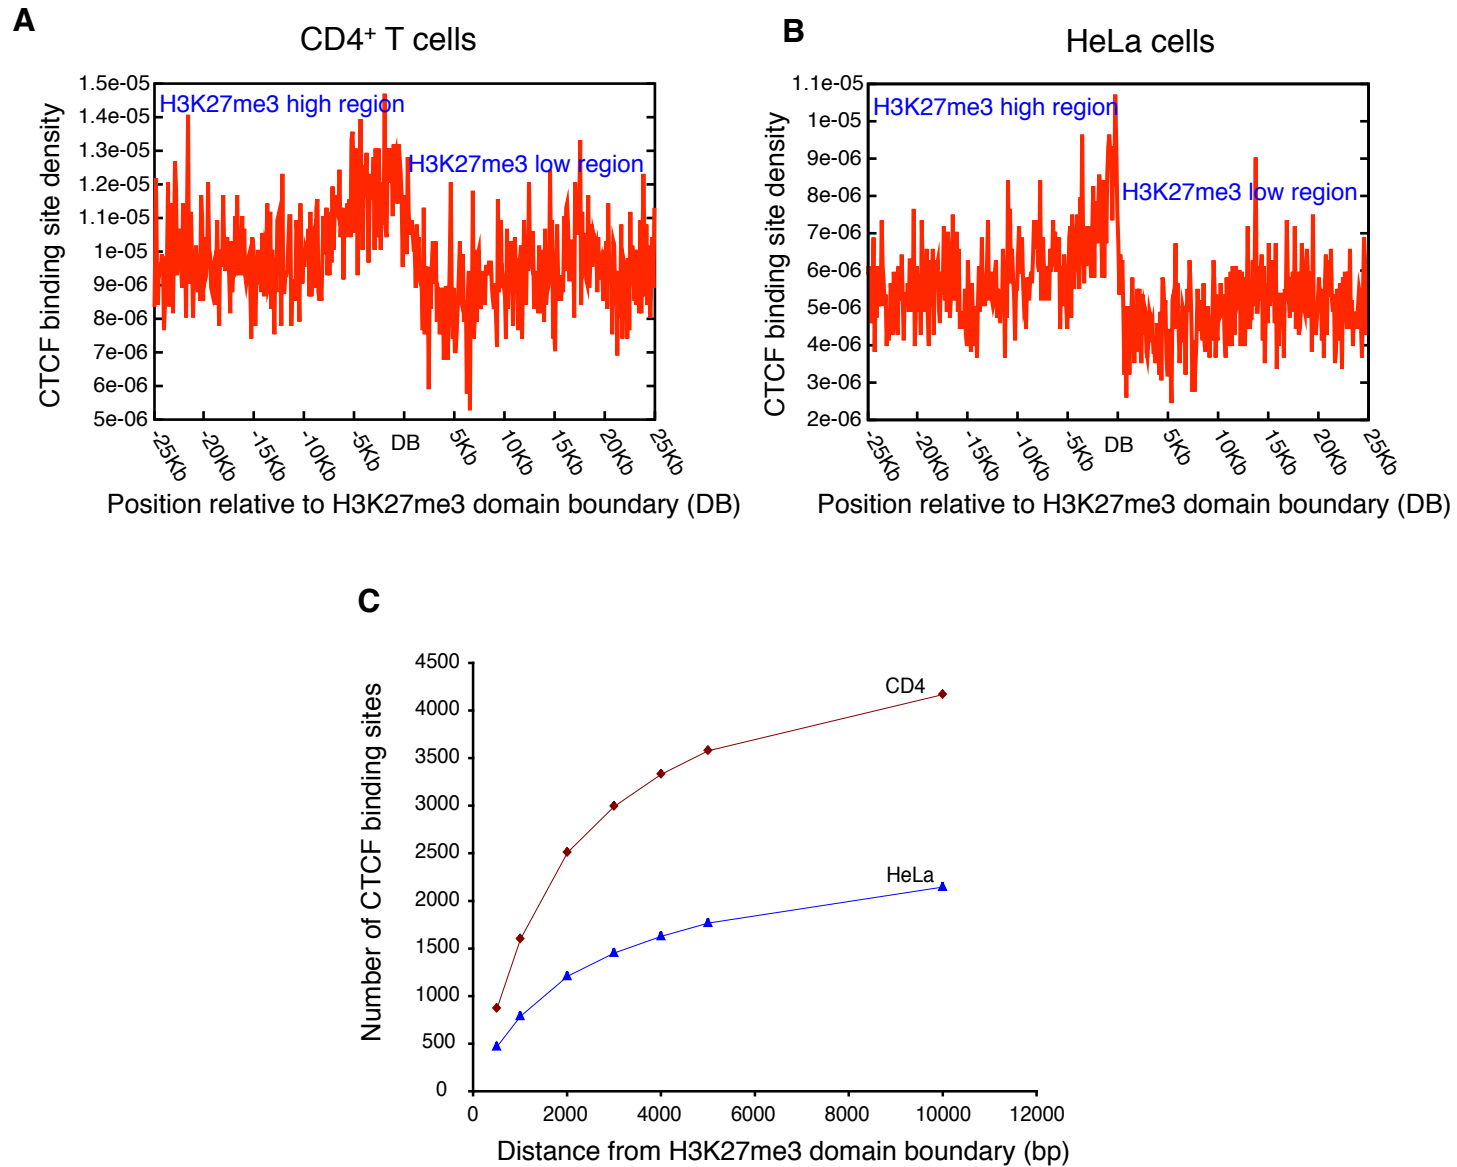

Supplement: Cuddapah_FigS2.pdf [file Cuddapah_FigS2.pdf]
