# Supplementary material for: Global analysis of the insulator binding protein CTCF in chromatin barrier regions reveals demarcation of active and repressive domains
Source: HighWire-hosted journal article supplement (doi:10.1101/gr.082800.108), 2008-12-03

Figure S3

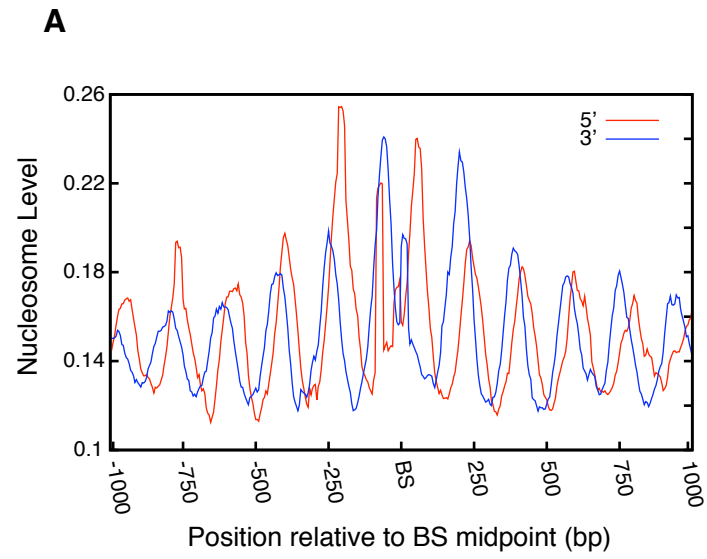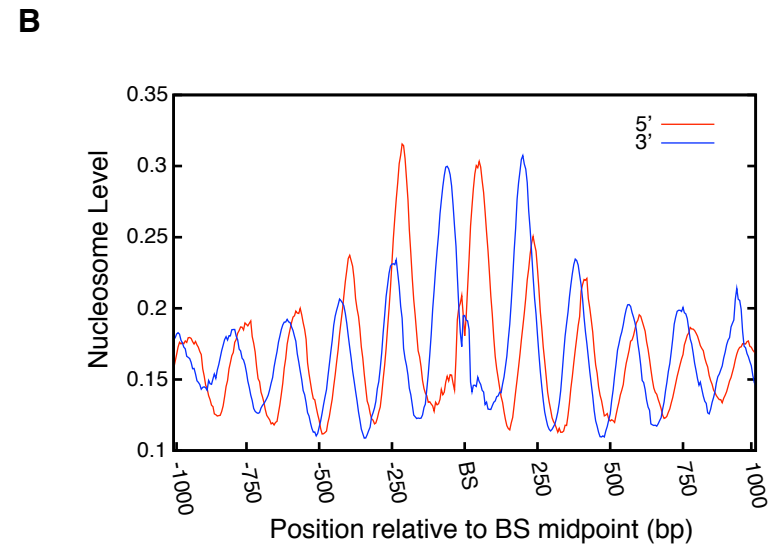

Supplement: cuddapah_FigS3.pdf [file cuddapah_FigS3.pdf]
